# Supplementary material
Source: Research Square preprint supplement (doi:10.21203/rs.3.rs-8975384/v1)
Supplement: Supplementary file 1 [file debc0b281401c58b510b1663.xlsx]

## Sheet: Sequence
Name	Sequence
WT, (Wild-Type, luciferase)	ATGGAAGACGCCAAAAACATAAAGAAAGGCCCGGCGCCATTCTATCCGCTAGAGGATGGAACCGCTGGAGAGCAACTGCATAAGGCTATGAAGAGATACGCCCTGGTTCCTGGAACAATTGCTTTTACAGATGCACATATCGAGGTGGACATCACGTACGCGGAATACTTCGAAATGTCCGTTCGGTTGGCAGAAGCTATGAAACGATATGGGCTGAATACAAATCACAGAATCGTCGTATGCAGTGAAAACTCTCTTCAATTCTTTATGCCGGTGTTGGGCGCGTTATTTATCGGAGTTGCAGTTGCGCCCGCGAACGACATTTATAATGAACGTGAATTGCTCAACAGTATGGGCATTTCGCAGCCTACCGTAGTGTTTGTTTCCAAAAAGGGGTTG…
R004 (luciferase)	ATGGAAGATGCCAAAAACATTAAGAAGGGCCCAGCGCCATTCTACCCACTCGAAGACGGGACCGCCGGCGAGCAGCTGCACAAAGCCATGAAGCGCTACGCCCTGGTGCCCGGCACCATCGCCTTTACCGACGCACATATCGAGGTGGACATTACCTACGCCGAGTACTTCGAGATGAGCGTTCGGCTGGCAGAAGCTATGAAGCGCTATGGGCTGAATACAAACCATCGGATCGTGGTGTGCAGCGAGAATAGCTTGCAGTTCTTCATGCCCGTGTTGGGTGCCCTGTTCATCGGTGTGGCTGTGGCCCCAGCTAACGACATCTACAACGAGCGCGAGCTGCTGAACAGCATGGGCATCAGCCAGCCCACCGTCGTATTCGTGAGCAAGAAAGGGCTG…
R008 (luciferase)	ATGGAGGACGCCAAGAACATCAAGAAGGGGCCCGCCCCTTTCTACCCACTGGAGGACGGCACAGCCGGAGAGCAGCTGCACAAGGCAATGAAACGGTACGCCCTGGTGCCCGGCACCATCGCCTTCACCGACGCCCACATCGAGGTGGACATCACCTACGCCGAGTACTTCGAGATGAGCGTGAGACTGGCCGAGGCCATGAAGAGATATGGCCTGAATACCAACCACCGGATCGTGGTGTGCAGCGAGAATTCTCTGCAGTTCTTCATGCCCGTGCTGGGCGCCCTGTTCATCGGCGTGGCCGTGGCACCTGCCAACGACATCTACAACGAGCGGGAGCTGCTGAACAGCATGGGCATCAGCCAGCCCACAGTGGTCTTCGTGAGCAAGAAAGGCCTG…
R009 (luciferase)	ATGGAGGACGCCAAGAACATCAAGAAGGGGCCCGCCCCTTTCTACCCACTGGAGGACGGCACAGCCGGCGAACAGCTGCACAAGGCAATGAAACGGTACGCCCTGGTGCCCGGCACCATCGCCTTCACCGACGCCCACATCGAGGTGGACATCACCTACGCCGAGTACTTCGAGATGAGCGTGCGCCTGGCCGAGGCCATGAAGAGATATGGCCTGAATACCAACCACCGGATCGTGGTGTGCAGCGAGAACAGCCTGCAGTTCTTCATGCCCGTGCTGGGCGCCCTGTTCATCGGCGTGGCCGTGGCACCTGCCAACGACATCTACAACGAGCGGGAGCTGCTGAACAGCATGGGCATCAGCCAGCCCACAGTGGTCTTCGTGAGCAAGAAAGGCCTG…
Wild-Type (RSV-F protein-HA tag)	ATGGAGCTGCTGATCCACAGGTTAAGTGCAATCTTCCTAACTCTTGCTATTAATGCATTGTACCTCACCTCAAGTCAGAACATAACTGAGGAGTTTTACCAATCGACATGTAGTGCAGTTAGCAGAGGTTATTTTAGTGCTTTAAGAACAGGTTGGTATACCAGTGTCATAACAATAGAATTAAGTAATATAAAAGAAACCAAATGCAATGGAACTGACACTAAAGTAAAACTTATAAAACAAGAATTAGATAAGTATAAGAATGCAGTGACAGAATTACAGCTACTTATGCAAAACACACCAGCTGCCAACAACCGGGCCAGAAGAGAAGCACCACAGTATATGAACTATACAATCAATACCACTAAAAACCTAAATGTATCAATAAGCAAGAAGAGG…
VB2 (RSV-F protein HA tag)	ATGGAGCTGCTGATCCACCGGCTGAGCGCCATCTTTCTGACACTGGCTATCAACGCCCTGTACCTGACCAGCTCCCAGAACATCACCGAGGAGTTCTACCAGAGCACCTGCAGCGCTGTGTCCCGGGGCTACTTCAGCGCCCTGAGAACCGGCTGGTACACCAGCGTGATCACCATCGAGCTGAGCAACATCAAAGAGACAAAGTGCAACGGCACCGACACAAAGGTGAAGCTGATCAAGCAGGAGCTGGACAAGTACAAGAACGCCGTGACCGAGCTGCAACTCCTGATGCAAAATACACCTGCTGCCAACAACCGGGCCCGGCGGGAGGCCCCCCAGTACATGAACTACACAATCAACACCACCAAGAACCTGAACGTGTCCATCAGCAAGAAGAGA…
VB3 (RSV-F protein HA tag)	ATGGAGCTGCTGATCCACCGGCTGAGCGCCATCTTCCTGACCCTGGCCATCAACGCCCTGTACCTGACCAGCAGCCAGAACATCACCGAGGAGTTCTACCAGAGCACCTGCAGCGCCGTGAGCCGGGGCTACTTCAGCGCCCTGCGGACCGGCTGGTACACCAGCGTGATCACCATCGAGCTGAGCAACATCAAGGAGACCAAGTGCAACGGCACCGACACCAAGGTGAAGCTGATCAAGCAGGAGCTGGACAAGTACAAGAACGCCGTGACCGAGCTGCAGCTGCTGATGCAGAACACCCCCGCCGCCAACAACCGGGCCCGGCGGGAGGCCCCCCAGTACATGAACTACACCATCAACACCACCAAGAACCTGAACGTGAGCATCAGCAAGAAGCGG…
